# Supplementary material
Source: MDPI journal article supplement (https://www.mdpi.com/2673-8449/3/4/15)
Supplement: s1 [file s1]

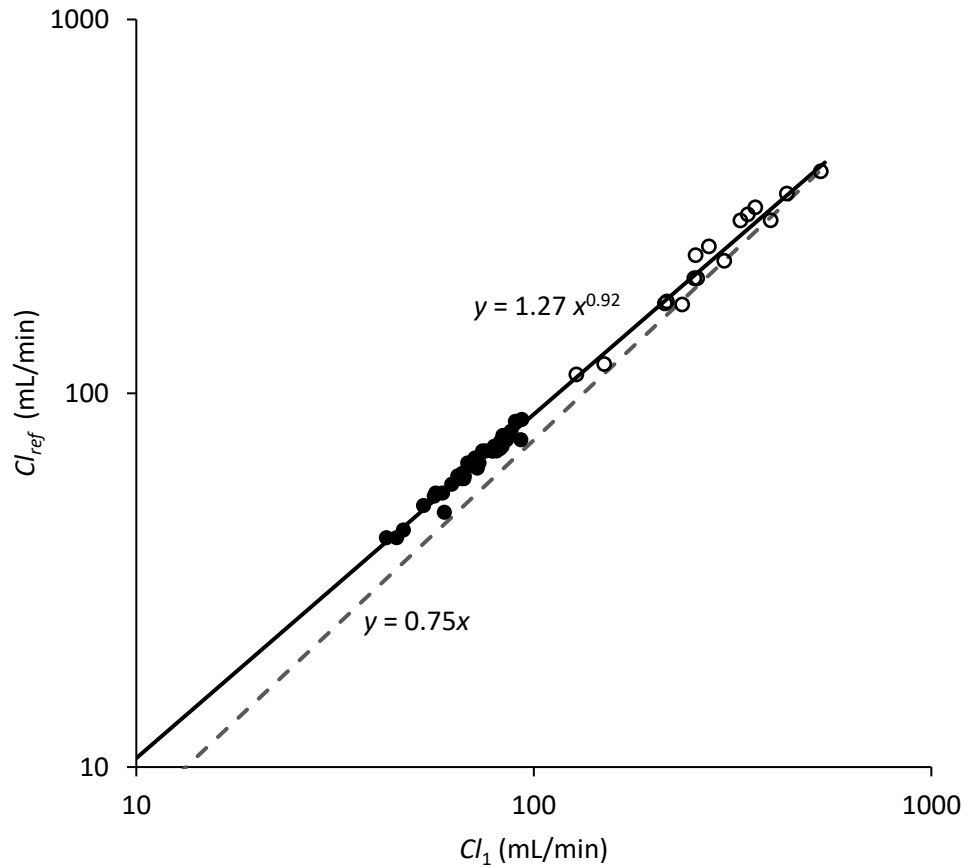

**Figure S1.** Log-log plot presenting clearance data from the present study (black circles) along with data from Luis-Lima et al. [2] (open circles). Two of the presented corrections are straight lines in such a plot: the present power function correction (1) is shown as a full line, and the Palnæs Hansen proportionality correction (3) is shown as a dashed line.

**Table S1.** Weight, full-curve clearance ( $Cl$ ), and one-pool approximation ( $Ch$ ) for the pigs in the present study.

| Pig ID | Measurement Number | Weight<br>kg | $Cl$<br>mL/min | $Ch$<br>mL/min* |
|--------|--------------------|--------------|----------------|-----------------|
| A      | first              | 35.8         | 85             | 93.3            |
| A      | second             | 36.0         | 72             | 83.3            |
| B      | first              | 31.5         | 72             | 79.6            |
| B      | second             | 33.0         | 70             | 75.6            |
| C      | first              | 31.2         | 75             | 92.8            |
| C      | second             | 34.8         | 79             | 87.6            |
| D      | first              | 35.0         | 59             | 66.1            |
| D      | second             | 38.4         | 70             | 80.6            |
| E      | first              | 27.2         | 54             | 59.0            |
| E      | second             | 33.8         | 41             | 42.6            |
| F      | first              | 27.4         | 50             | 52.8            |
| F      | second             | 33.6         | 60             | 64.4            |
| G      | first              | 32.0         | 41             | 45.2            |
| G      | second             | 34.2         | 48             | 59.6            |
| H      | first              | 26.0         | 59             | 64.7            |
| H      | second             | 31.4         | 64             | 69.6            |
| I      | first              | 37.4         | 77             | 83.7            |

|   |        |      |    |      |
|---|--------|------|----|------|
| I | second | 37.2 | 67 | 71.2 |
| J | first  | 33.2 | 60 | 65.0 |
| J | second | 42.0 | 84 | 89.9 |
| K | first  | 32.0 | 75 | 84.6 |
| K | second | 36.0 | 63 | 72.1 |
| L | first  | 31.4 | 60 | 66.9 |
| L | second | 36.0 | 57 | 62.2 |
| M | first  | 29.6 | 43 | 47.0 |
| M | second | 37.2 | 61 | 66.1 |
| N | first  | 38.0 | 72 | 80.5 |
| N | second | 43.8 | 74 | 82.4 |
| O | first  | 37.0 | 70 | 74.4 |
| O | second | 39.6 | 70 | 78.7 |
| P | first  | 35.0 | 65 | 68.2 |
| P | second | 41.0 | 59 | 66.7 |
| Q | first  | 37.0 | 71 | 81.1 |
| Q | second | 41.2 | 75 | 83.1 |
| R | first  | 34.4 | 70 | 78.8 |
| R | second | 38.5 | 75 | 85.5 |
| S | first  | 34.0 | 71 | 82.2 |
| S | second | 35.2 | 65 | 72.9 |
| T | first  | 37.6 | 53 | 56.2 |
| T | second | 38.6 | 54 | 56.7 |

---

\* The  $Ch$  value is based on 5 samples (120-240 min), as the most stable of the calculated  $Ch$  values
