# Supplementary material
Source: MDPI journal article supplement (https://www.mdpi.com/2673-8449/3/4/15)
Supplement: s1 [file s1]

Archive with 1 entries (1 files):
- biologics-2538039-supplementary.pdf
